# Supplementary material
Source: PubMed Central journal article supplement (PMC2786513)
Supplement: supp_75_22_7086__1.pdf [file supp_75_22_7086__1.pdf]

TABLE S1. Summary of bacterial 16S rRNA gene sequence-based OTUs detected in Dan and Halfdan PW.

| Phylum<br>Sequence<br>representing<br>OTU   | No. of<br>clones in<br>OTU | Closest match <sup>†</sup><br>(Acc. no. %)                     | Closest cultivated species <sup>‡</sup><br>(Acc.no., %)   | Source of closest<br>match     |
|---------------------------------------------|----------------------------|----------------------------------------------------------------|-----------------------------------------------------------|--------------------------------|
| <b>Dan PW</b>                               |                            |                                                                |                                                           |                                |
| <b>Firmicutes</b>                           |                            |                                                                |                                                           |                                |
| Dan_Bac67                                   | 24                         | Uncultured <i>Caminicella</i> sp. clone TCB15y (DQ647125, 99)  | <i>Clostridium</i> sp. Dex60-4 (AJ431242, 93)             | High-temperature oil field     |
| Dan_Bac48                                   | 9                          | Uncultured organism clone MAT-CR-H3-C02 (EU245157, 93)         | <i>Caloanaerobacter azorensis</i> (AJ272422, 93)          | Solar saltern                  |
| Dan_Bac95                                   | 4                          | Uncultured bacterium clone Niigata-25 (AB243993, 98)           | <i>Desulfonispira thiosulfatigenes</i> (Y18214, 89)       | Oil production well            |
| Dan_Bac42                                   | 2                          | <i>Thermohalobacter berrensii</i> (AF113543, 98)               | <i>Thermohalobacter berrensii</i> (AF113543, 98)          | Solar saltern                  |
| Dan_Bac58                                   | 3                          | <i>Moorella thermoacetica</i> ATCC 39073 (CP000232, 87)        | <i>Moorella thermoacetica</i> ATCC 39073 (CP000232, 87)   | Horse manure                   |
| Dan_Bac50                                   | 1                          | <i>Thermoanaerobacter mathranii</i> (Y11297, 98)               | <i>Thermoanaerobacter mathranii</i> (Y11297, 98)          | Icelandic hot spring           |
| Dan_Bac26                                   | 2                          | Uncultured bacterium clone 1-9E (EU289466, 96)                 | <i>Marinilactibacillus piezotolerans</i> (AB294178, 94)   | Tropical plant material        |
| Dan_Bac44                                   | 1                          | Uncultured bacterium clone 1-9E (EU289466, 91)                 | <i>Marinilactibacillus piezotolerans</i> (AB294178, 89)   | Tropical plant material        |
| Dan_Bac55                                   | 1                          | Uncultured bacterium clone F2V (DQ860054, 98)                  | <i>Vagococcus salmoninarum</i> (Y18097, 98)               | Aqua culture                   |
| Dan_Bac29                                   | 1                          | <i>Desulfotomaculum geothermicum</i> (Y11567, 92)              | <i>Desulfotomaculum geothermicum</i> (Y11567, 92)         | Geothermal ground water        |
| <b><math>\alpha</math>-Proteobacteria</b>   |                            |                                                                |                                                           |                                |
| Dan_Bac47                                   | 1                          | Uncultured bacterium clone 96O1 (EU676403, 99)                 | <i>Skermanella</i> sp. 5416T-32 (DQ672568, 99)            | Heavy metal contaminated soils |
| <b><math>\gamma</math>-Proteobacteria</b>   |                            |                                                                |                                                           |                                |
| Dan_Bac63                                   | 1                          | <i>Stenotrophomonas maltophila</i> EC-S105 (AB200253, 99)      | <i>Stenotrophomonas maltophila</i> EC-S105 (AB200253, 99) | Rhizoplane                     |
| <b><math>\delta</math>-Proteobacteria</b>   |                            |                                                                |                                                           |                                |
| Dan_Bac27                                   | 1                          | Uncultured organism clone MAT-CR-H4-C05 (EU245216, 88)         | <i>Desulfonatronum lacustre</i> DSM 10312 (AF418171, 88)  | Solar saltern                  |
| Dan_Bac76                                   | 3                          | Uncultured bacterium clone E3_10.3_1 (FJ716972, 98)            | <i>Desulfovibrio</i> sp. EBD (DQ218320, 98)               | Estuarine microbial mat        |
| Dan_Bac73                                   | 3                          | <i>Desulfacinum infernum</i> (L27426, 97)                      | <i>Desulfacinum infernum</i> (L27426, 97)                 | High-temperature oil reservoir |
| <b><math>\epsilon</math>-Proteobacteria</b> |                            |                                                                |                                                           |                                |
| Dan_Bac25                                   | 1                          | Uncultured <i>Arcobacter</i> sp. clone YJQ-18 (AY569293, 98)   | <i>Arcobacter</i> sp. (L42994, 98)                        | Hot spring                     |
| <b>Candidate division OP9</b>               |                            |                                                                |                                                           |                                |
| Dan_Bac65                                   | 6                          | Candidate division OP9 clone OPB47 (AF027082, 93)              |                                                           | Yellowstone hot spring         |
| <b>Thermotogales</b>                        |                            |                                                                |                                                           |                                |
| Dan_Bac70                                   | 1                          | <i>Thermotogales</i> bacterium TBF 19.5.1 clone (EU980631, 99) | <i>Thermotogales</i> bacterium Ag70 (AB260048, 99)        | Oil production fluid           |
| <b>Synergistes</b>                          |                            |                                                                |                                                           |                                |
| Dan_Bac74                                   | 3                          | Bacterium enrichment culture clone PW20.10B (EU573140, 99)     | <i>Thermovirga lienii</i> (DQ071273, 99)                  | Ekofisk oil reservoir          |
| <b>Halfdan PW</b>                           |                            |                                                                |                                                           |                                |
| <b>Firmicutes</b>                           |                            |                                                                |                                                           |                                |
| Hda_Bac36                                   | 22                         | Uncultured <i>Caminicella</i> sp. clone TCB15y (DQ647125, 99)  | <i>Clostridium</i> sp. Dex60-4 (AJ431242, 92)             | High-temperature oil field     |
| Hda_Bac1                                    | 3                          | Uncultured <i>Caminicella</i> sp. clone TCB15y (DQ647125, 98)  | <i>Clostridium</i> sp. Dex60-4 (AJ431242, 93)             | High-temperature oil field     |
| Hda_Bac15                                   | 3                          | Uncultured bacterium clone K2y (DQ647066, 99)                  | <i>Clostridium</i> sp. Dex60-61 (AJ431243, 94)            | High-temperature oil field     |

|                                 |   |                                                                  |                                                           |                                |
|---------------------------------|---|------------------------------------------------------------------|-----------------------------------------------------------|--------------------------------|
| Hda_Bac29                       | 1 | Uncultured <i>Caminicella</i> sp. clone TCB15y (DQ647125, 96)    | <i>Clostridium</i> sp. Dex60-4 (AJ431242, 91)             | High-temperature oil field     |
| Hda_Bac43                       | 1 | Uncultured <i>Caminicella</i> sp. clone TCB15y (DQ647125, 96)    | <i>Clostridium</i> sp. Dex60-4 (AJ431242, 91)             | High-temperature oil field     |
| Hda_Bac9                        | 6 | <i>Desulfotomaculum geothermicum</i> (Y11567, 90)                | <i>Desulfotomaculum geothermicum</i> (Y11567, 90)         | Geothermal ground water        |
| <b><i>γ-Proteobacteria</i></b>  |   |                                                                  |                                                           |                                |
| Hda_Bac7                        | 1 | <i>Stenotrophomonas maltophila</i> EC-S105 (AB200253, 99)        | <i>Stenotrophomonas maltophila</i> EC-S105 (AB200253, 99) | Rhizoplane                     |
| <b><i>δ-Proteobacteria</i></b>  |   |                                                                  |                                                           |                                |
| Hda_Bac14                       | 1 | <i>Desulfacinum infernum</i> (L27426, 96)                        | <i>Desulfacinum infernum</i> (L27426, 96)                 | High-temperature oil reservoir |
| Hda_Bac8                        | 1 | Bacterium enrichment culture clone PW5.5B (EU573126, 99)         | <i>Pelobacter carbinolicus</i> DSM 2380 (CP000142, 96)    | Ekofisk oil reservoir          |
| <b><i>ε-Proteobacteria</i></b>  |   |                                                                  |                                                           |                                |
| Hda_Bac23                       | 2 | Epsilon proteobacterium AN-BI3A (AM157656, 97)                   | Epsilon proteobacterium AN-BI3A (AM157656, 97)            | Deep-sea halocline             |
| <b><i>Synergistes</i></b>       |   |                                                                  |                                                           |                                |
| Hda_Bac51                       | 1 | Bacterium enrichment culture clone PW20.10B (EU573140, 99)       | <i>Thermovirga lienii</i> (DQ071273, 99)                  | Ekofisk oil reservoir          |
| <b><i>Deferribacterales</i></b> |   |                                                                  |                                                           |                                |
| Hda_Bac32                       | 3 | Uncultured <i>Deferribacteres</i> bacterium clone (EU721778, 99) | <i>Flexistipes</i> sp. vp180 (AF220344, 98)               | Petroleum reservoir            |
| Hda_Bac26                       | 1 | <i>Deferribacter thermophilus</i> (NR_026043, 97)                | <i>Deferribacter thermophilus</i> (NR_026043, 97)         | Petroleum reservoir            |
| Hda_Bac18                       | 1 | <i>Deferribacter thermophilus</i> (NR_026043, 97)                | <i>Deferribacter thermophilus</i> (NR_026043, 97)         | Petroleum reservoir            |

† Closest related sequence as revealed from BLAST search, Genbank accession number and percentage of 16S rRNA gene sequence similarity.

TABLE S2. Summary of archaeal 16S rRNA gene sequence-based OTUs detected in Dan and Halfdan PW.

| Phylum<br>Sequence<br>representing<br>OTU | No. of<br>clones in<br>OTU | Closest match <sup>†</sup><br>(Acc. no. %)              | Closest cultivated species <sup>†</sup><br>(Acc.no., %) | Source of closest<br>match |
|-------------------------------------------|----------------------------|---------------------------------------------------------|---------------------------------------------------------|----------------------------|
| <b>Dan PW</b>                             |                            |                                                         |                                                         |                            |
| <b><i>Thermococcales</i></b>              |                            |                                                         |                                                         |                            |
| Dan_Arch62                                | 12                         | <i>Thermococcus aegaeus</i> DSM 12767 (AY099171, 99)    | <i>Thermococcus aegaeus</i> DSM 12767 (AY099171, 99)    | Hydrothermal deep sea vent |
| Dan_Arch34                                | 8                          | <i>Thermococcus aegaeus</i> DSM 12767 (AY099171, 98)    | <i>Thermococcus aegaeus</i> DSM 12767 (AY099171, 98)    | Hydrothermal deep sea vent |
| Dan_Arch54                                | 2                          | <i>Thermococcus aegaeus</i> DSM 12767 (AY099171, 97)    | <i>Thermococcus aegaeus</i> DSM 12767 (AY099171, 97)    | Hydrothermal deep sea vent |
| Dan_Arch61                                | 1                          | <i>Thermococcus litoralis</i> DSM 5474 (AY099180, 95)   | <i>Thermococcus litoralis</i> DSM 5474 (AY099180, 95)   | Hydrothermal deep sea vent |
| Dan_Arch50                                | 1                          | <i>Thermococcus aegaeus</i> DSM 12767 (AY099171, 93)    | <i>Thermococcus aegaeus</i> DSM 12767 (AY099171, 93)    | Hydrothermal deep sea vent |
| <b><i>Methanococcales</i></b>             |                            |                                                         |                                                         |                            |
| Dan_Arch65                                | 6                          | <i>Methanococcus thermolithotrophicus</i> (M59128, 97)  | <i>Methanococcus thermolithotrophicus</i> (M59128, 97)  | Heated sea sediments       |
| Dan_Arch32                                | 2                          | Archaeon enrichment culture clone EA29.6 (EU573144, 99) | <i>Methanococcus thermolithotrophicus</i> (M59128, 97)  | Ekofisk oil reservoir      |
| <b><i>Archaeoglobales</i></b>             |                            |                                                         |                                                         |                            |
| Dan_Arch53                                | 7                          | <i>Archaeoglobus fulgidus</i> DSM 4304 (AE000782, 99)   | <i>Archaeoglobus fulgidus</i> DSM 4304 (AE000782, 99)   | Submarine hot spring       |
| Dan_Arch46                                | 1                          | <i>Archaeoglobus fulgidus</i> DSM 4304 (AE000782, 97)   | <i>Archaeoglobus fulgidus</i> DSM 4304 (AE000782, 97)   | Submarine hot spring       |
| <b>HalfDan PW</b>                         |                            |                                                         |                                                         |                            |
| <b><i>Thermococcales</i></b>              |                            |                                                         |                                                         |                            |
| Hda_Arch3                                 | 26                         | <i>Thermococcus aegaeus</i> DSM 12767 (AY099171, 99)    | <i>Thermococcus aegaeus</i> DSM 12767 (AY099171, 99)    | Hydrothermal deep sea vent |
| Hda_Arch2                                 | 5                          | <i>Thermococcus aegaeus</i> DSM 12767 (AY099171, 98)    | <i>Thermococcus aegaeus</i> DSM 12767 (AY099171, 98)    | Hydrothermal deep sea vent |
| <b><i>Methanococcales</i></b>             |                            |                                                         |                                                         |                            |
| Hda_Arch35                                | 2                          | <i>Methanococcus thermolithotrophicus</i> (M59128, 99)  | <i>Methanococcus thermolithotrophicus</i> (M59128, 99)  | Heated sea sediments       |
| <b><i>Archaeoglobales</i></b>             |                            |                                                         |                                                         |                            |
| Hda_Arch9                                 | 3                          | <i>Archaeoglobus fulgidus</i> DSM 4304 (AE000782, 99)   | <i>Archaeoglobus fulgidus</i> DSM 4304 (AE000782, 99)   | Submarine hot spring       |

<sup>†</sup> Closest related sequence as revealed from BLAST search, Genbank accession number and percentage of 16S rRNA gene sequence similarity.

TABLE S3. Summary of *dsrAB* gene sequence-based OTUs detected in Dan and Halfdan PW.

| Phylum<br>Sequence<br>representing OTU    | No. of<br>clones in<br>OTU | Closest match (Acc.no., %) <sup>†</sup>                                                                                   |
|-------------------------------------------|----------------------------|---------------------------------------------------------------------------------------------------------------------------|
| <b>Dan PW</b>                             |                            |                                                                                                                           |
| <i>Archaeoglobales</i><br>Dan_dsr69       | 27                         | <i>Archaeoglobus fulgidus</i> DSM 4304 (AE000782, 99)                                                                     |
| <i>Synthrophobacterales</i><br>Dan_dsr25T | 2                          | <i>Desulfacinum infernum</i> DSM 9756 (AF418194, 94)                                                                      |
| <b>HalfDan PW</b>                         |                            |                                                                                                                           |
| <i>Archaeoglobales</i><br>Hda_dsr24       | 23                         | <i>Archaeoglobus fulgidus</i> DSM 4304 (AE000782, 100)                                                                    |
| <i>Synthrophobacterales</i><br>Hda_dsr20T | 5                          | <i>Desulfacinum infernum</i> DSM 9756 (AF418194, 94)                                                                      |
| <i>Clostridiales</i><br>Hda_dsr92T        | 3                          | Uncultured sulfate-reducing bacterium clone B04P001 (AY197448, 82)<br><i>Desulfotomaculum geothermicum</i> (AF273029, 80) |

<sup>†</sup> Closest related sequence as revealed from BLAST search, Genbank accession number and percentage of *dsrAB* gene sequence similarity.
